# Supplementary material for: Investigating phase transformation in the Li1.2Co0.1Mn0.55Ni0.15O2 lithium-ion battery cathode during high-voltage hold (4.5 V) via magnetic, X-ray diffraction and electron microscopy studies
Source: Royal Society of Chemistry journal article supplement (doi:10.1039/c3ta10304h), 2013-01-01
Supplement: c3ta10304h.pdf [file c3ta10304h.pdf]

## Supporting Information

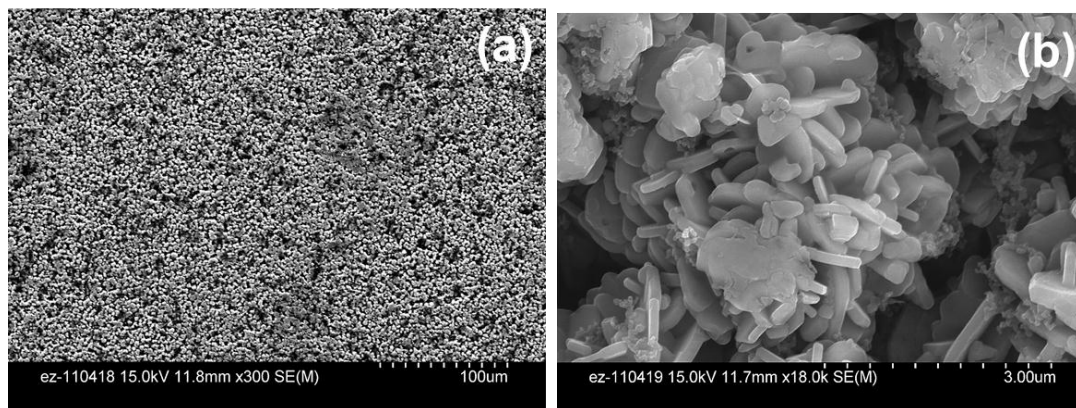

**Figure S1:** The SEM image of the pristine electrode  $\text{Li}_{1.2}\text{Co}_{0.1}\text{Mn}_{0.55}\text{Ni}_{0.15}\text{O}_2$  electrode at low magnification (a) and high magnification (b). The platelet morphology of the particle can be observed similar to lithium stoichiometric NMC material

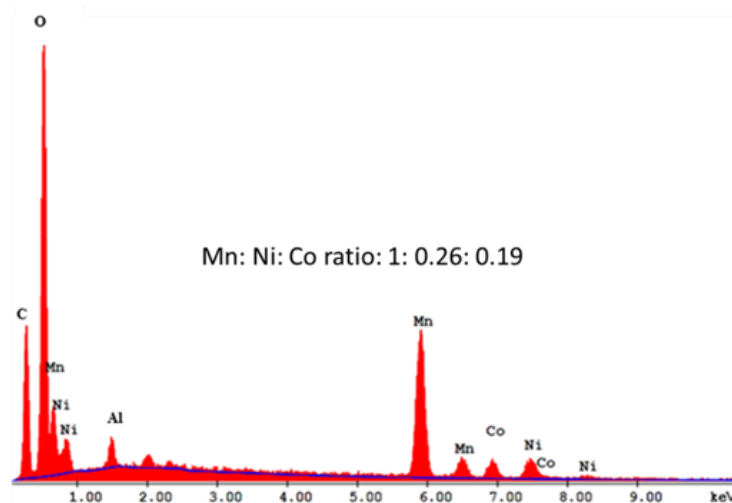

**Figure S2:** EDS spectrum collected from the pristine electrode. The Mn:Ni:Co ratio is 1:0.26:0.19 which is in agreement with the TM composition of electrode  $\text{Li}_{1.2}\text{Co}_{0.1}\text{Mn}_{0.55}\text{Ni}_{0.15}\text{O}_2$ .

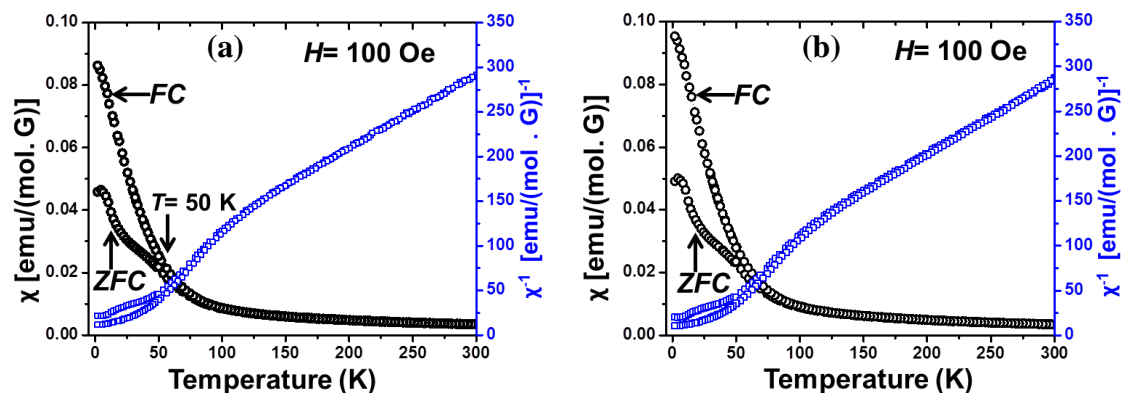

**Figure S3:** Magnetic susceptibility vs. temperature curves for electrode (a) and powder samples (b) show no difference in the trend.

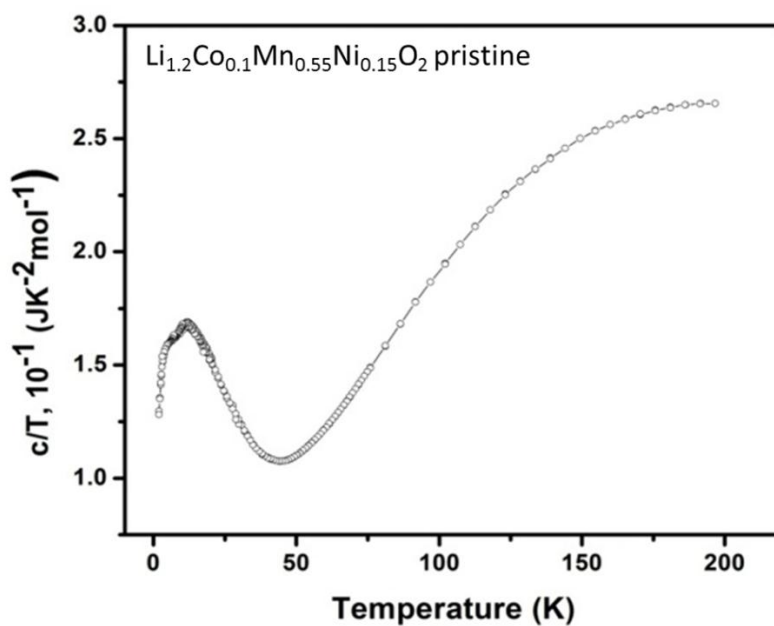

**Figure S4:** Heat capacity data of pristine  $\text{Li}_{1.2}\text{Co}_{0.1}\text{Mn}_{0.55}\text{Ni}_{0.15}\text{O}_2$  shows  $\lambda$ -like feature indicating the magnetic transition occurs at  $T=50$  K

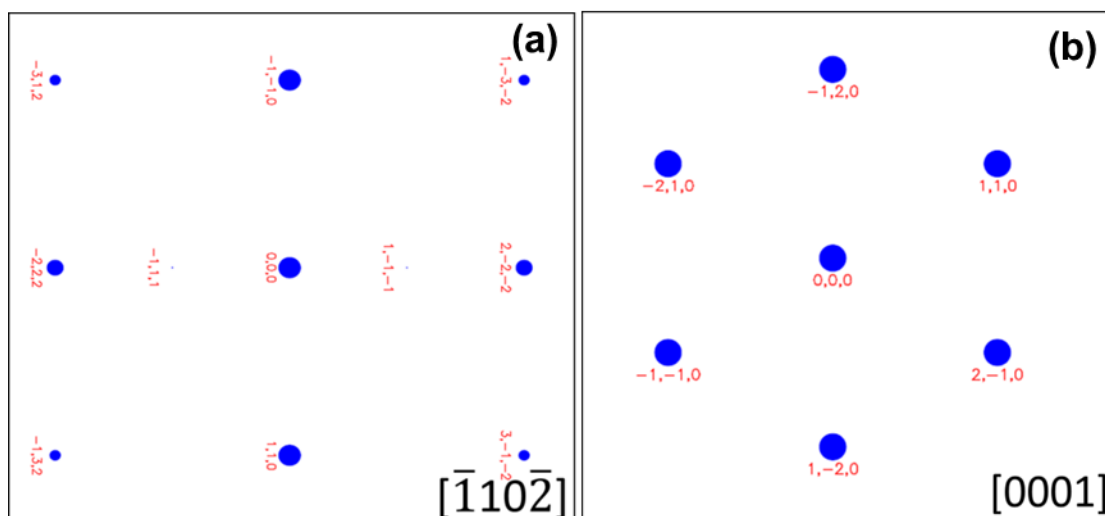

**Figure S5:** Simulated SAED pattern along  $[\bar{1}10\bar{1}]$  (a) and  $[0001]$  (b) zone axis of trigonal ( $O3$ )  $R\bar{3}m$  unit cell.

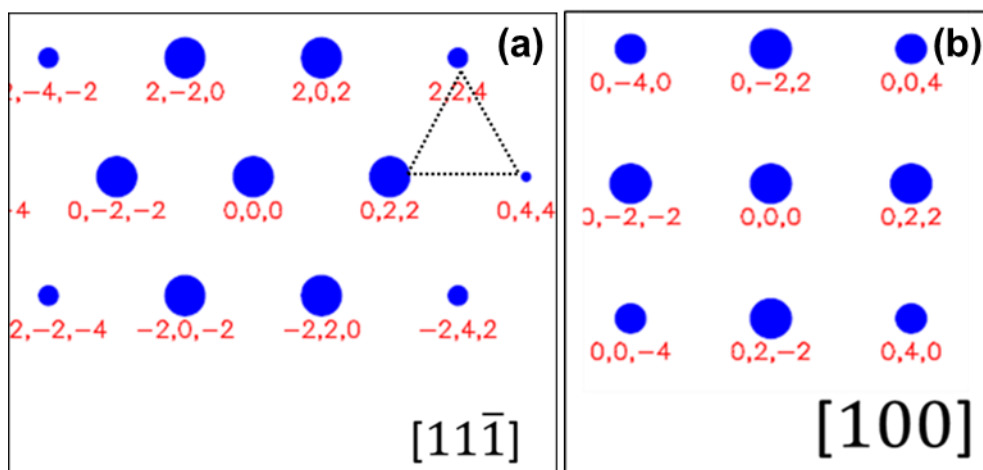

**Figure S6:** Simulated SAED pattern along  $[11\bar{1}]$  (a) and  $[100]$  (b) zone axis of spinel  $Fd\bar{3}m$  unit cell.

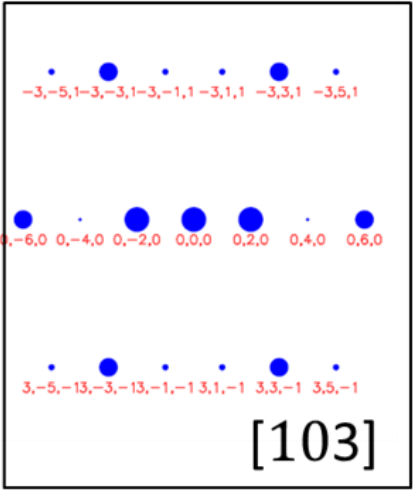

**Figure S7:** Simulated SAED pattern along [103] zone axis of monoclinic  $C2/m$  unit cell.
